# Supplementary material for: Reinvestigation of the mechanism of polymerization of β-butyrolactone from 1,5,7-triazabicyclo[4.4.0]dec-5-ene
Source: Royal Society of Chemistry journal article supplement (doi:10.1039/c8py00206a), 2018-01-01
Supplement: c8py00206a1.pdf [file c8py00206a1.pdf]

Supporting Information

**Reinvestigation of the Mechanism of Polymerization of  $\beta$ - Butyrolactone from 1,5,7-Triazabicyclo[4.4.0]dec-5-ene.**

S. Moins, C. Henoumont, J. De Winter, A.Khalil, S. Laurent, S. Cammas-Marion and O. Coulembier

Table of content :

- Polymerization of BL from a PyCOOH/TBD mixture at 60°C in bulk : page 2
  - 1) Protocol : page 2
  - 2) Table of results : page 2
  - 3) SEC evolution : page 2
- Tables : page 3
  - 1) Table S1 : page 3
- Figures : page 4
  - 1) Figure S1-a : page 4
  - 2) Figure S1-b : page 4
  - 3) Figure S2 : page 5
  - 4) Figure S3 : page 6
  - 5) Figure S4 : page 6
  - 6) Figure S5 : page 7

### Polymerization of BL from a PyCOOH/TBD mixture (bulk, 60°C, $[BL]_0/[TBD]_0 = 190$ )

In a glove box, a dried vial was charged with 200 mg of BL ( $n = 2.32 \times 10^{-3}$  mol), 6 mg of PyCOOH ( $n = 2.44 \times 10^{-5}$  mol) and a stirring bar. After solubilization of the PyCOOH (2 hours), 200 mg of BL were added in order to target a final DP of 190. 3.2 mg of TBD ( $n = 2.3 \times 10^{-5}$  mol) were then introduced and the vial was sealed. Out of the box, the medium was immersed in a 60°C oil bath to start the polymerization. A kinetic experiment was started after 2 minutes of thermal homogenization. Samples were withdrawn after precise reaction times and analyzed by SEC analysis using a DRI/UV detector.

| Polym. time (min) | $M_n$ SEC (g.mol <sup>-1</sup> ) | $\bar{D}_M$ |
|-------------------|----------------------------------|-------------|
| 20                | 250                              | 1.08        |
| 40                | 640                              | 1.19        |
| 60                | 1200                             | 1.25        |
| 80                | 1350                             | 1.24        |
| 120               | 1900                             | 1.27        |
| 160               | 2700                             | 1.23        |
| 210               | 3100                             | 1.25        |
| 270               | 3200                             | 1.30        |
| 350               | 3550                             | 1.30        |

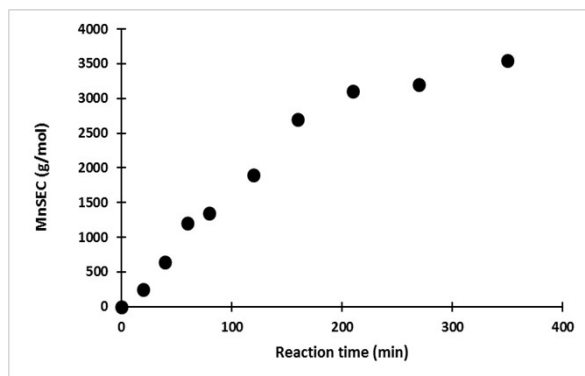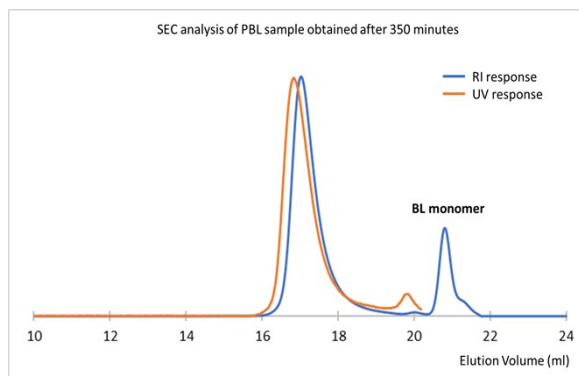

## Tables

**Table S1.** Molecular characterizations of *cyclo*-PdMMLABe obtained from ZROP of dMMLABe by IMes carbene in THF at r.t. ( $[dMMLABe]_0 = 1.45M$ ;  $[dMMLABe]_0/[IMes]_0 = 116$ )

| Polym. time (min) | Conv. (%) | $M_n$ SEC (g·mol <sup>-1</sup> ) | $\bar{D}_M$ |
|-------------------|-----------|----------------------------------|-------------|
| 8                 | 31.5      | 4220                             | 1.32        |
| 28 <sup>a</sup>   | 59        | 7880                             | 1.34        |
| 72                | 90        | 12000                            | 1.29        |
| 104               | 94.4      | 14700                            | 1.26        |
| 150               | 95.7      | 16400                            | 1.26        |

- a) The MALDI analysis of that sample presents a  $M_n$  of 13600 g/mol<sup>-1</sup> and a cyclic structure as demonstrated by isotopic simulations

**Figures**

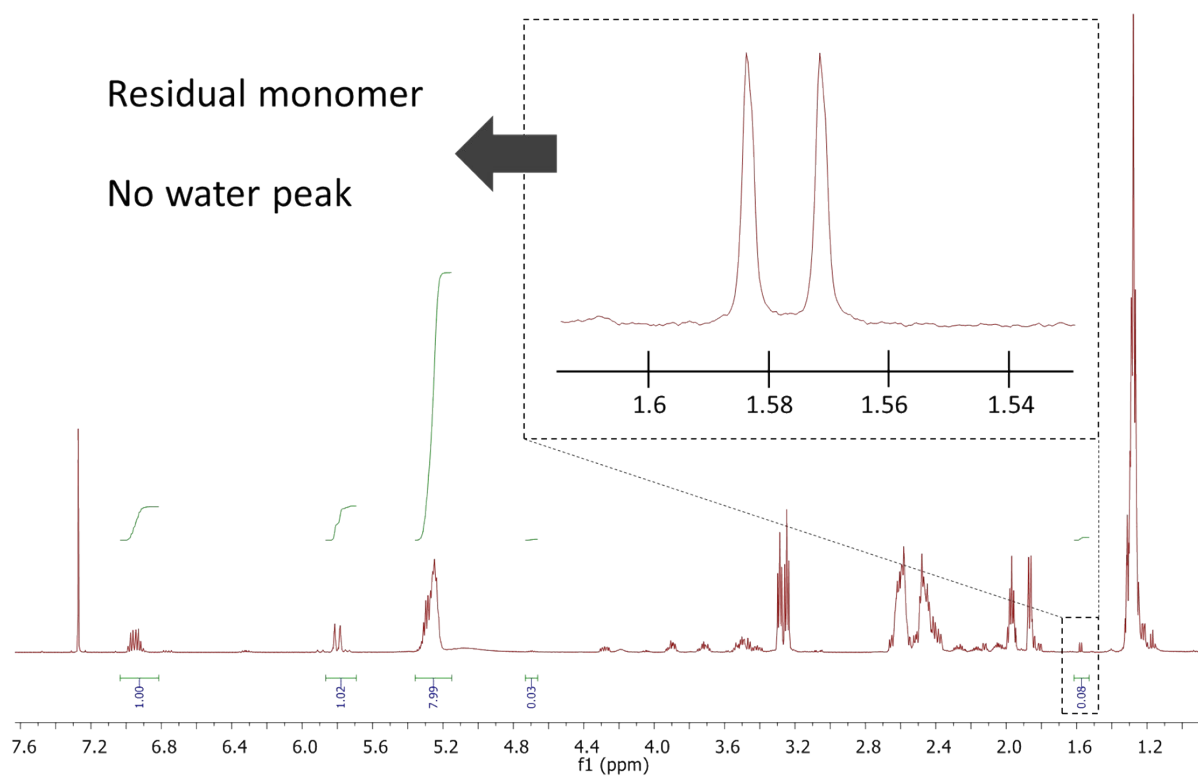

**Figure S1-a.**  $^1\text{H-NMR}$  analysis of the  $\text{PBL}_3$  crude medium (recorded in  $\text{CDCl}_3$  at  $21^\circ\text{C}$ )

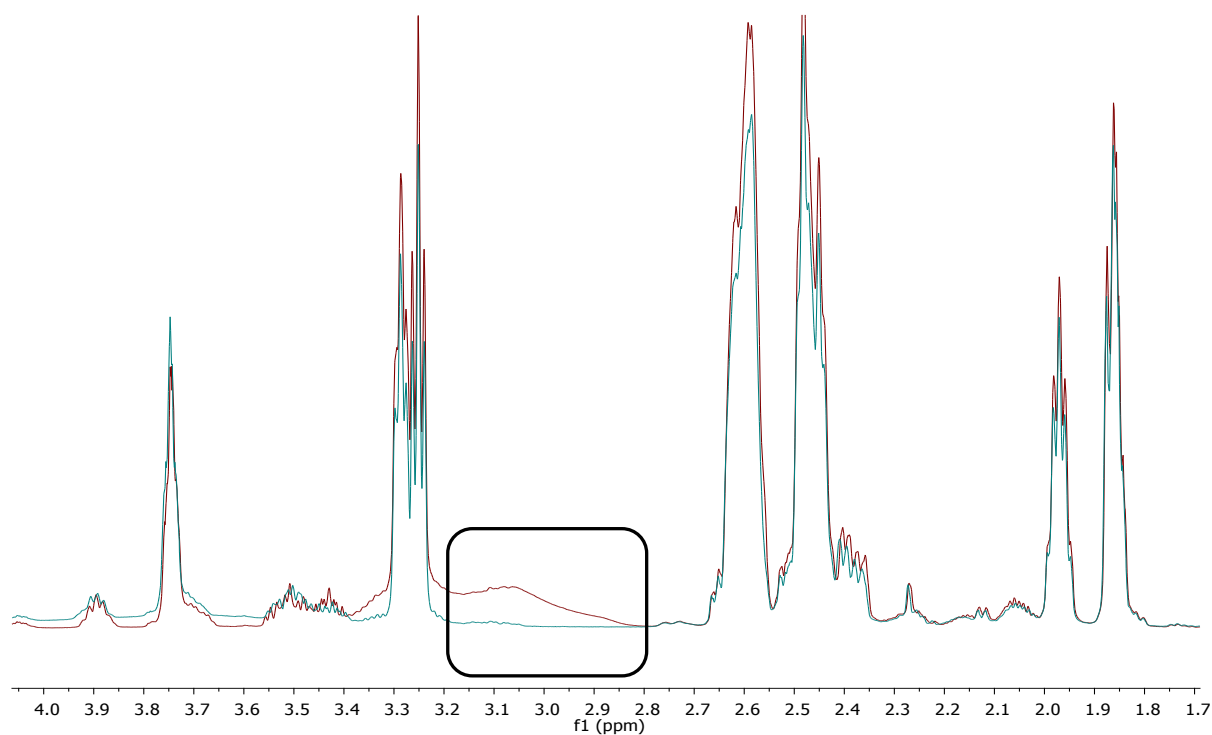

**Figure S1-b.**  $^1\text{H-NMR}$  comparison (recorded in  $\text{CDCl}_3$  at  $21^\circ\text{C}$ ) of the  $\text{PBL}_8$  crude medium before (blue spectrum) and after addition of 10 mol% of water (red spectrum)

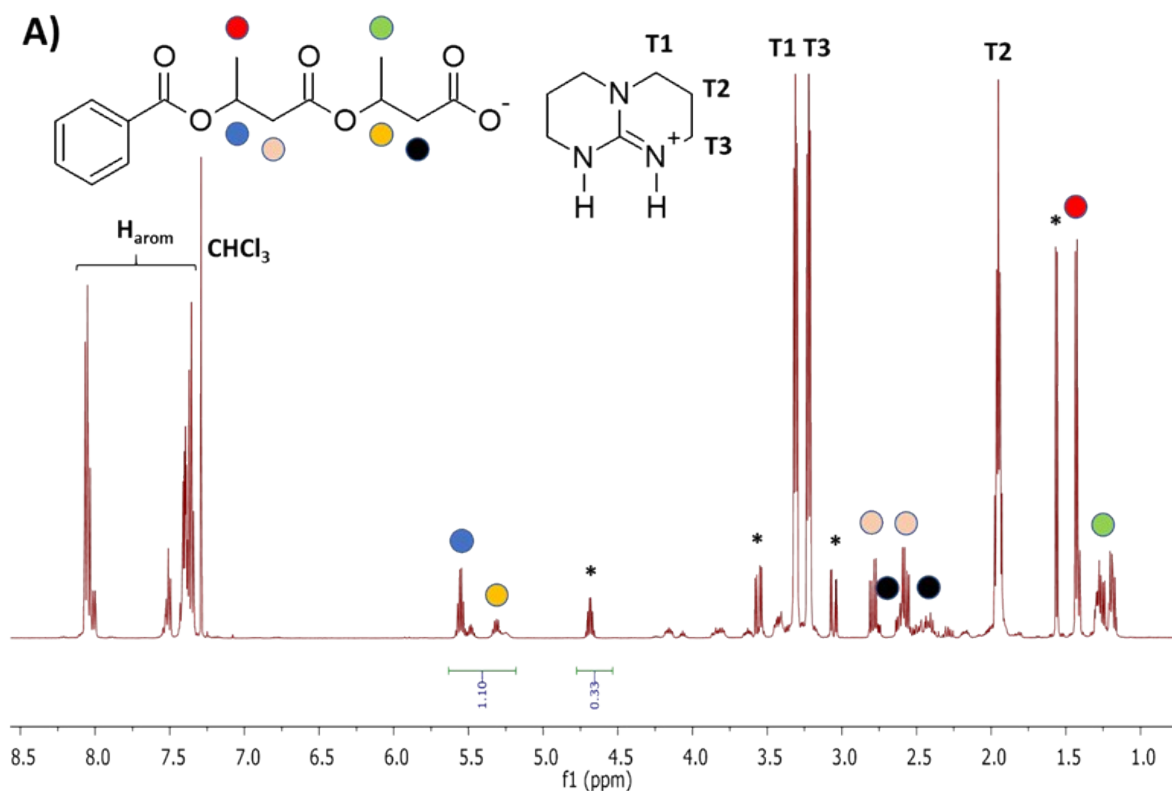

**Figure S2.**  $^1\text{H-NMR}$  spectra of a mixture of benzoic acid/TBD salt and BL (1/1.5) recorded after 12 hours at r.t. (A) and 12 hours at r.t. + 1 hour at  $60^\circ\text{C}$  (B). \* correspond to BL monomer signal. R corresponds to H or a BL unit. E and Z represent both crotonate isomers. Signals appearing between 3.2 and 4 are hypothetically attributed to TBD protons from TBD interacting with crotonic acid, butyric acid and benzoic acid (if any).

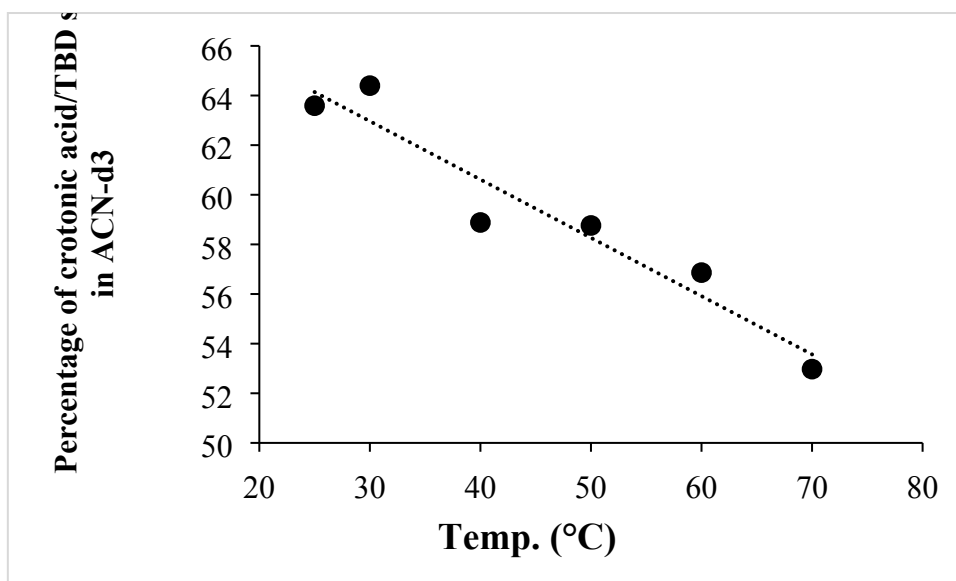

**Figure S3.** Percentage of crotonic acid/TBD salt calculated by  $^1\text{H-NMR}$  analyses in  $\text{CD}_3\text{CN}$  in function of the temperature from a 1:1 crotonic acid/TBD mixture.

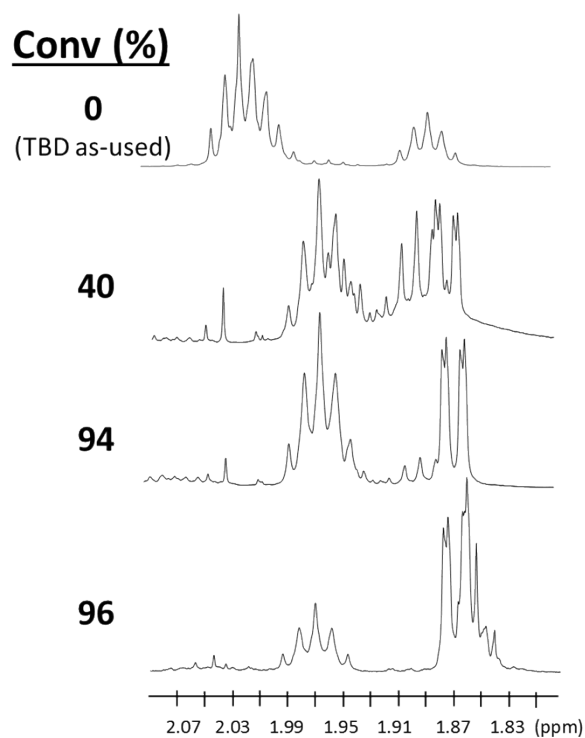

**Figure S4.** Evolution of TBD protonic signals (centered between 1.8 and 2.1 ppm, in  $\text{CDCl}_3$ ) in function of the conversion as recorded during the BL bulk ROP ( $[\text{BL}]_0/[\text{TBD}]_0 = 50$ ,  $60^\circ\text{C}$ )

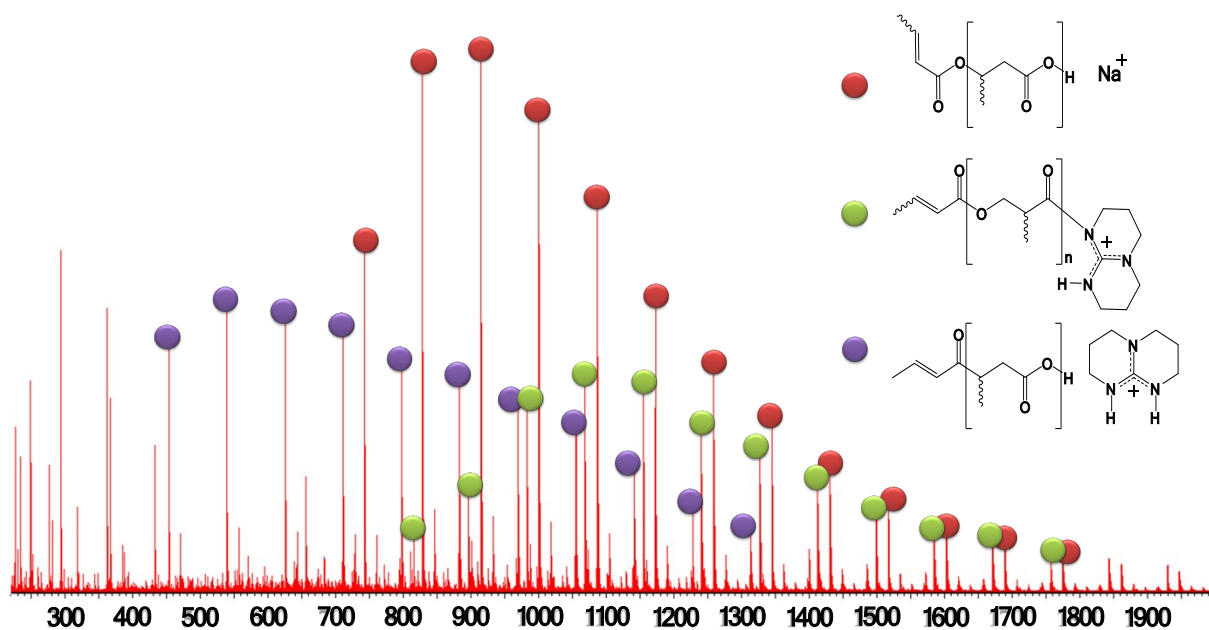

**Figure S5.** ESI-MS analysis of PBL<sub>8</sub> (realized without addition of NaI)

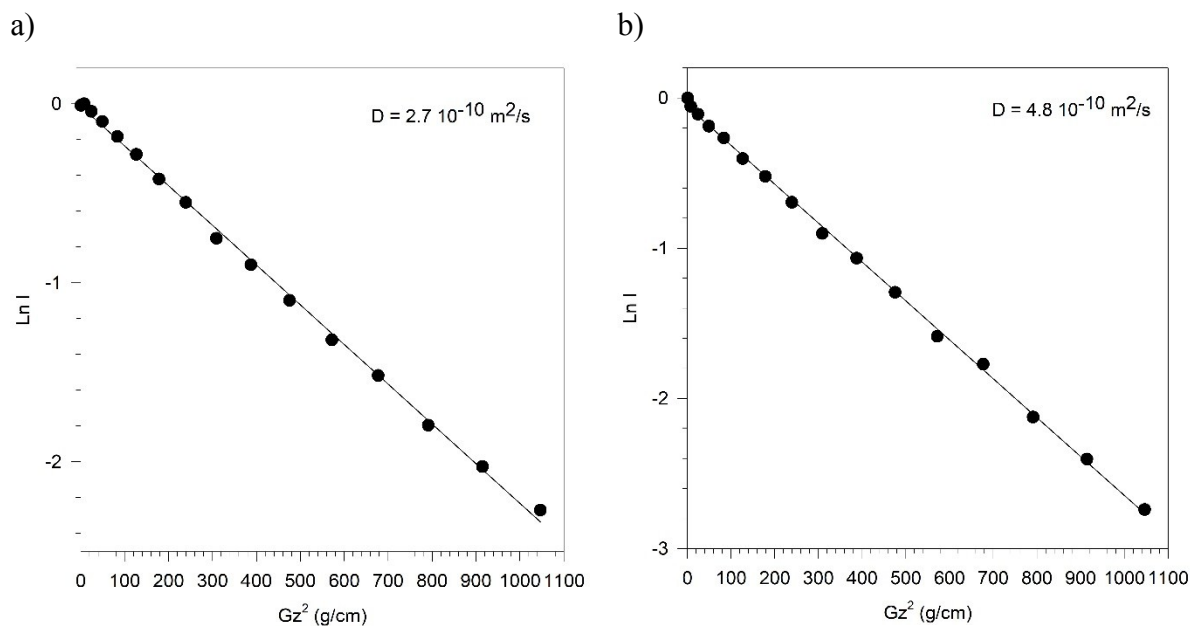

**Figure S6.** Examples of diffusion curves obtained on a solution of PBL<sub>48</sub> in CD<sub>3</sub>CN, a) on one of the peaks of the polymer at 1.2 ppm and b) on one of the peaks of TBD at 3.15 ppm. The linear evolution is, according to equation 1 (see experimental part), typical of a mono-diffusing species.
